# Supplementary material for: Activity-Dependent Synaptic Plasticity of a Chalcogenide Electronic Synapse for Neuromorphic Systems
Source: PubMed Central journal article supplement — Sci Rep. 2014 May 9;4:4906. doi: 10.1038/srep04906 (PMC4014880; doi:10.1038/srep04906), 2014-05-09
Supplement: srep04906-s1.pdf [file srep04906-s1.pdf]

## **Supporting Information**

### **Activity-Dependent Synaptic Plasticity of a Chalcogenide Electronic Synapse for Neuromorphic Systems**

Yi Li,<sup>1,2\*</sup> Yingpeng Zhong,<sup>1,2\*</sup> Jinjian Zhang,<sup>1,2</sup> Lei Xu,<sup>1,2</sup> Qing Wang,<sup>1,2</sup> Huajun Sun,<sup>1,2</sup> Hao Tong,<sup>1,2</sup> Xiaoming Cheng<sup>1,2</sup> & Xiangshui Miao<sup>1,2,3</sup>

<sup>1</sup>Wuhan National Laboratory for Optoelectronics, Huazhong University of Science and Technology, Wuhan 430074, China.

<sup>2</sup>School of Optical and Electronic Information, Huazhong University of Science and Technology, Wuhan 430074, China.

<sup>3</sup>Wuhan National High Magnetic Field Center, Huazhong University of Science and Technology, Wuhan 430074, China.

Correspondence and requests for materials should be addressed to X. M. (miaoxs@hust.edu.cn)

\*These authors contributed equally to this work.

## Supplementary Figures

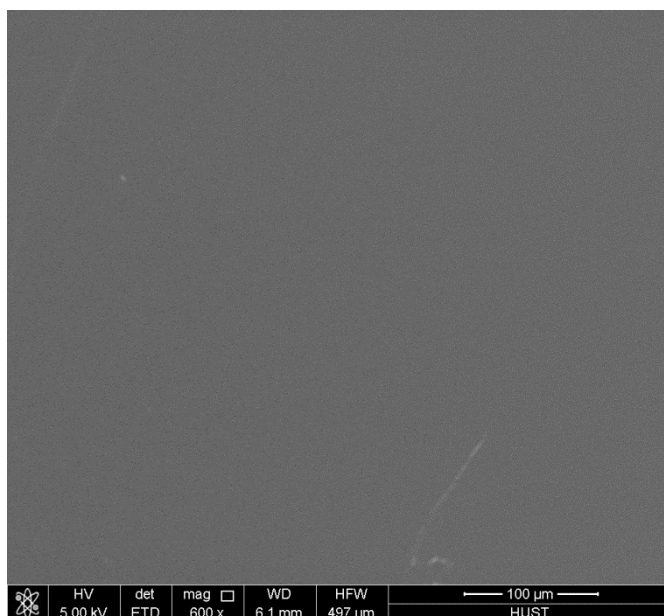

**Supplementary Figure S1 | SEM image of 100 nm as-deposited AgInSbTe film on a silicon substrate.** The smooth character of morphological features shows uniform deposition of the film.

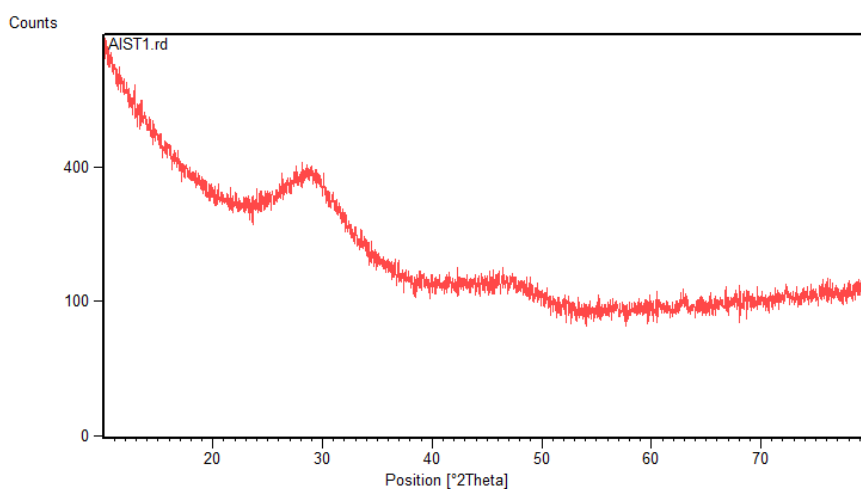

**Supplementary Figure S2 | X-ray diffraction scans of the 100 nm as-deposited AgInSbTe film on a quartz substrate.** The two broad peaks indicate a disordered amorphous phase.

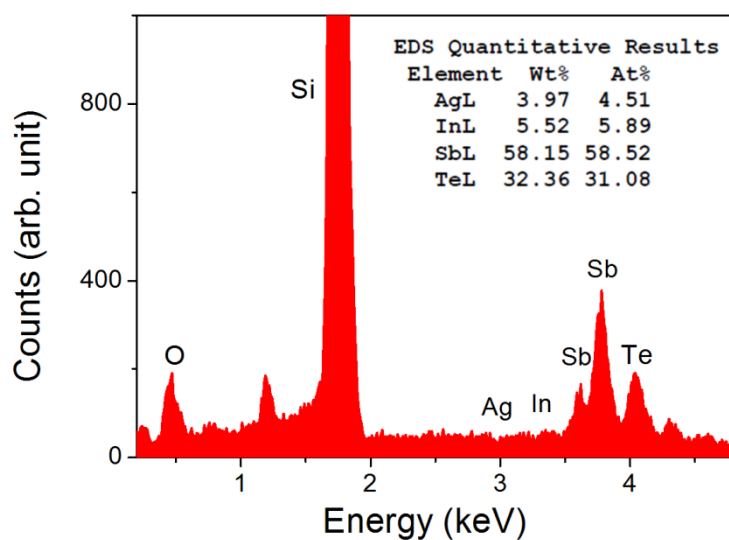

**Supplementary Figure S3 | EDX of the 100 nm as-deposited AgInSbTe film on a silicon substrate.** The EDX spectrum shows that the Ag : In : Sb : Te atom ratio is 4.51 : 5.89 : 58.52 : 31.08.

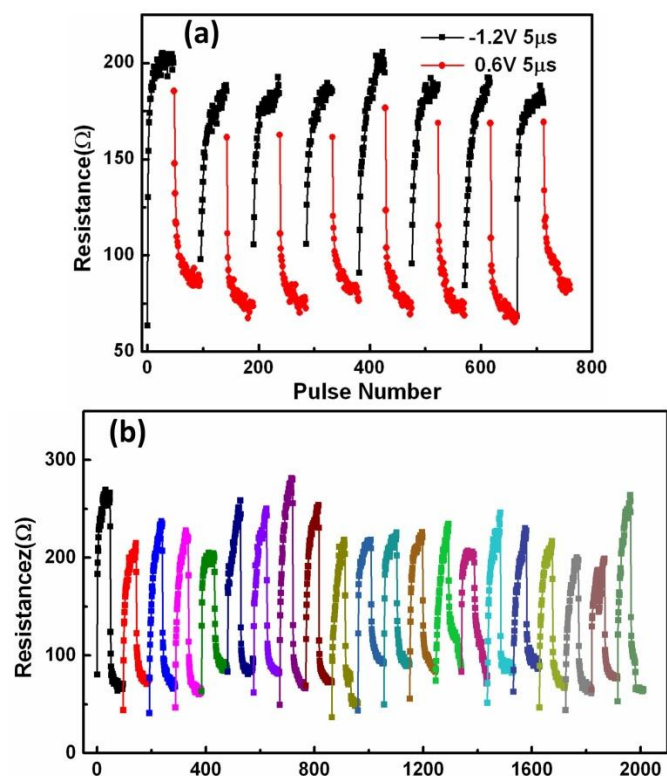

**Supplementary Figure S4 | Reproducibility of gradual resistance tuning.** (a) in one Ag/AIST/Ag cell. (b) in different cells represented by different colours.

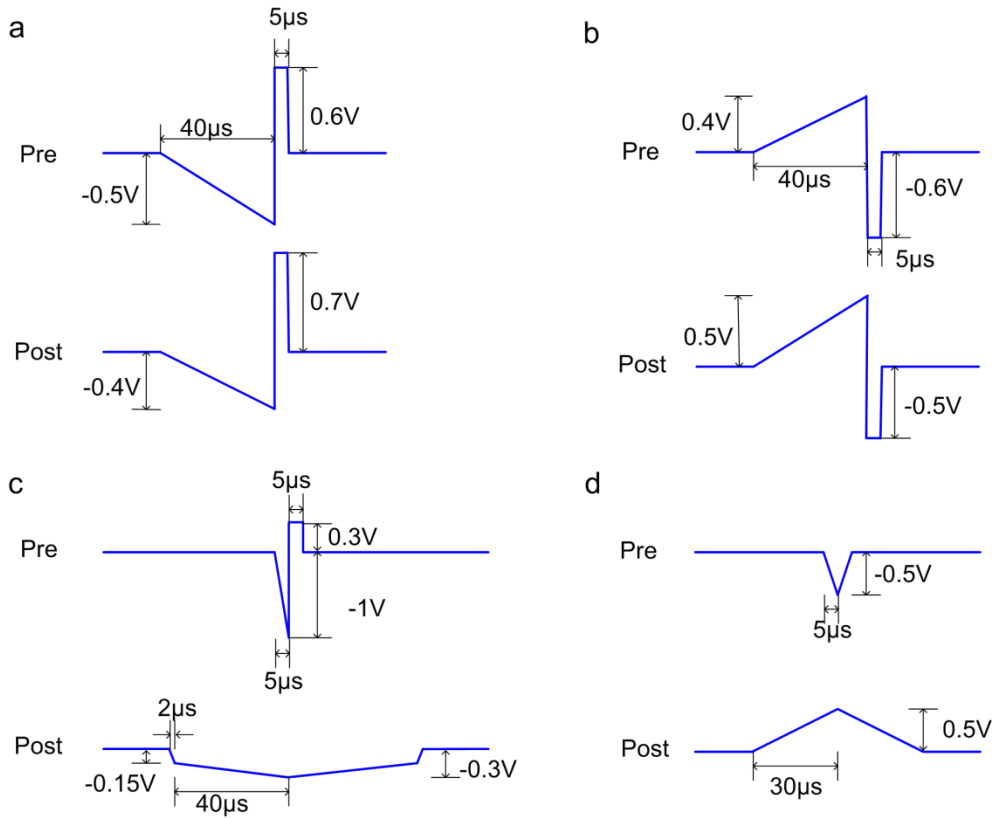

**Supplementary Figure S5 | Pre- and postsynaptic spikes utilized to implement STDP.** (a) Spikes for asymmetric Hebbian learning rule. (b) Spikes for asymmetric anti-Hebbian learning rule. (c) Spikes for symmetric Hebbian learning rule. (d) Spikes for symmetric anti-Hebbian learning rule.

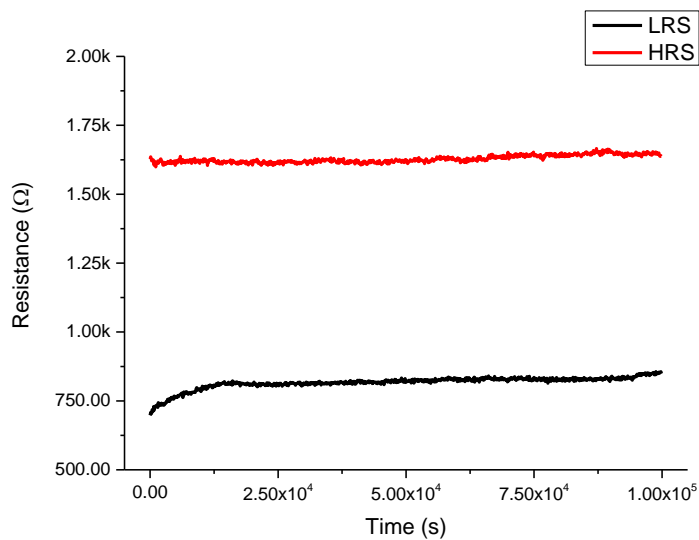

**Supplementary Figure S6 | The retention property of a  $20 \times 20 \mu\text{m}^2$  Ag/AgInSbTe/Ag memristor for 100,000 s.**
